# Supplementary material for: Efficient integration of transmembrane domains depends on the folding properties of the upstream sequences
Source: PubMed Central journal article supplement — Proc Natl Acad Sci U S A. 2021 Aug 9;118(33):e2102675118. doi: 10.1073/pnas.2102675118 (PMC8379923; doi:10.1073/pnas.2102675118), 2021-08-09
Supplement: pnas.2102675118.sapp.pdf [file pnas.2102675118.sapp.pdf]

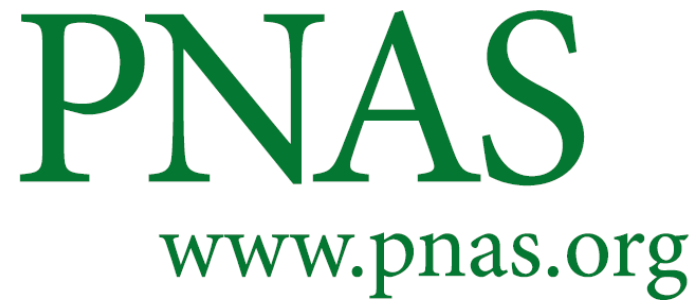

**Supplementary Information for**

**Efficient integration of transmembrane domains depends on the folding properties of the upstream sequences**

**Marco Janoschke, Mirjam Zimmermann, Anna Brunauer, Raffael Humbel, Tina Junne, and Martin Spiess**

Corresponding author: Martin Spiess  
Email: martin.spiess@unibas.ch

**This PDF file includes:**

Tables S1 to S2

**Table S1.** Amino acid sequences of the model proteins analyzed.

|                                                                                                                                                                                                                                                                                                                                                                                                                                                                                                                                                                                                                                                                                                                                                                                                                                                                                                                                                     |
|-----------------------------------------------------------------------------------------------------------------------------------------------------------------------------------------------------------------------------------------------------------------------------------------------------------------------------------------------------------------------------------------------------------------------------------------------------------------------------------------------------------------------------------------------------------------------------------------------------------------------------------------------------------------------------------------------------------------------------------------------------------------------------------------------------------------------------------------------------------------------------------------------------------------------------------------------------|
| <p>ST-DP128:</p> <p>MEGGEEEVERIPDELFDTKKKHLLDKLIRVGIILVLLIWGTVLLLKSIPHHSNTPDYQEPNSNYTNDGKL<br/> KVSFSVVRNNTFQPKYHELOWISDNKIESNDLGLYVTFMND SYVVKSVYDDSYNSVLLEGKTFIHNGQNL<br/> TVESITASPDLKRLLRIRTNVQNRHSTFGGPGAAAALALAALALAAAAGPGGWWEITHNTLFI PAN<br/> ETFD RPHNGYVDILPIGGYNHLAYFENSNS SHYKTLTEGKWEVVNGPLAFDSMENRLYFISTRKSSTERH<br/> VYYIDLRSPNEIEVTDTS EDGVYDVSFSSGRRFGLLTYKGPVYQKIVDFHSRKA EKCDKGNVLGKSL<br/> YHLEKNEVLTKILEDYAVPRKSFRELNLGKDEFKGDILVNSYEILPNDFDETLSDHYPVFFAYGGPNSQ<br/> QVVKTF SVGFNEVVASQLNAIVVVVDGRGTGFKGQDFRSLVRDRLGDYEARDQISAASLYGSLTFVDPQK<br/> ISLFGWSYGGYLT LKLEKDGGRHF KYGMSVAPVTDWRFYDSVYTERYMHTPQENFDGYVESSVHNV TAL<br/> AQANRFLLMHGTGDDNVHFQNSLKFLDLLDLNGVENYDVHVF PDS DHSIRYHNANVIVFDKLLDWAKRAF<br/> DGQFVKACYPYDVPDYAGYPYDVPDYAYPYDVPDYA •</p>                                                                                                                                                                       |
| <p>RI-DP128:</p> <p>MEGGEEEVERIPDELFDTKKKHLLDKLIRVGIILVLLIWGTVLLLKSIPHHSNTPDYQEPNSNYTNDGKL<br/> KVSFSVVRNNTFQPKYHELOWISDNKIESNDLGLYVTFMND SYVVKSVYDDSYNSVLLEGKTFIHNGQNL<br/> TVESITRSMEGGEEEVERIPDELFDTKKKHLLDKLIRVGIILVLLIWGTVLLLKSIPHHSNTPDYQEPNS<br/> NYTNDGK LKVSFSVVRNNTFQPKYHELOWISDNKIESNDLGLYVTFMND SYVVKSVYDDSYNSVLLEGKT<br/> FIHNGQNLTVESITASPDLKRLLRIRTNVQNRHSTFGGPGAAAALALAALALAAAAGPGGWWEITH<br/> NTLFI PANETFD RPHNGYVDILPIGGYNHLAYFENSNS SHYKTLTEGKWEVVNGPLAFDSMENRLYFIST<br/> RKSSTERHVYYIDLRSPNEIEVTDTS EDGVYDVSFSSGRRFGLLTYKGPVYQKIVDFHSRKA EKCDK<br/> GNVLGKSLYHLEKNEVLTKILEDYAVPRKSFRELNLGKDEFKGDILVNSYEILPNDFDETLSDHYPVFFF<br/> AYGGPNSQ QVVKTF SVGFNEVVASQLNAIVVVVDGRGTGFKGQDFRSLVRDRLGDYEARDQISAASLYGS<br/> LTFVDPQKISLFGWSYGGYLT LKLEKDGGRHF KYGMSVAPVTDWRFYDSVYTERYMHTPQENFDGYVES<br/> SVHNV TALA QANRFLLMHGTGDDNVHFQNSLKFLDLLDLNGVENYDVHVF PDS DHSIRYHNANVIVFDK L<br/> LDWAKRAFDGQFVKACYPYDVPDYAGYPYDVPDYAYPYDVPDYA •</p> |

The sequences are color-coded to indicate their origin: black, DPAPB; purple, H-segment (as an example L5 is shown); gray, C-terminal triple HA-tag and linker residues. The function of transmembrane segments as signal-anchor, stop-transfer, or re-integration sequences is indicated by a red, blue, or green background, respectively. The relevant loop sequences preceding the H-segments are underlined. Potential glycosylation sites are shown in red.

**Table S2.** Amino acid sequences of the luminal spacer preceding the stop-transfer H-segments.

|                                                                                                                                                                                                                                                                                                 |
|-------------------------------------------------------------------------------------------------------------------------------------------------------------------------------------------------------------------------------------------------------------------------------------------------|
| <p>ST-DP50:<br/>           KSIPHHSNTPDYQEPNS<b>NYT</b>NDGKLVKRLLIIRTNSVQNRHSTF<b>GGPG</b></p>                                                                                                                                                                                                   |
| <p>ST-Spwt161:<br/>           KSIPHHSNTPDYQEPNS<b>NYT</b>NDGKLVSFVVR<b>NT</b>SSSS<b>KLNE</b>SHRLHQFFRMDDEESWIKEKLLVS<br/>           SEDYGRDLTGVQNLRKKHKRLEAELAAHEPAIQGVLDTGKKLSDDNTIGKEEIQORLAQFVDHWKELKQL<br/>           AAARGQRLEEHR<b>L</b>G<b>ST</b>S<b>GGPG</b></p>                        |
| <p>ST-Spmut161:<br/>           KSIPHHSNTPDYQEPNS<b>NYT</b>NDGKLVSFVVR<b>NT</b>SSSS<b>KLNE</b>SHRLHQFFRMDDEESWIKEKLLVS<br/>           SEDYGRDLTGVQNLRKKHKR<b>GP</b>GP<b>GP</b>GP<b>GP</b>PAIQGVLDTGKKLSDDNTIGKEEIQORLAQFVDHWKELKQL<br/>           AAARGQRLEEHR<b>L</b>G<b>ST</b>S<b>GGPG</b></p> |
| <p>ST-GS144:<br/>           KSIPHHSNTPDYQEPNS<b>NYT</b>NDGKLVSFVVR<b>NT</b>STQESGSGSGSGSGSGSGSGSGSGSGSGSSGSGSGS<br/>           QESGSGSGSGSGSGSGSGSGSGSGSGSQESGSGSGSGSGSGSGSGSGSGSGSSGSGSGSQESGSS<br/> <b>GGPG</b></p>                                                                           |
| <p>ST-Chp144:<br/>           KSIPHHSNTPDYQEPNS<b>NYT</b>NDGKLVSFVVR<b>NT</b>STQESGKSA<b>HWDFAWPW</b>ASRSGDSA<b>FWGLWPWEA</b><br/>           QESGKSA<b>HWDFAWPW</b>ASRSGDSA<b>FWGLWPWEA</b>QESGKSA<b>HWDFAWPW</b>ASRSGDSA<b>FWGLWPWEA</b>QESGSS<br/> <b>GGPG</b></p>                             |
| <p>ST-Scr144:<br/>           KSIPHHSNTPDYQEPNS<b>NYT</b>NDGKLVSFVVR<b>NT</b>STQESGKWSA<b>HSWR</b>FAPAL<b>SWSDGAFEWAPDWG</b><br/>           QESGKWSA<b>HSWR</b>FAPAL<b>SWSDGAFEWAPDWG</b>QESGKWSA<b>HSWR</b>FAPAL<b>SWSDGAFEWAPDWG</b>QESGSS<br/> <b>GGPG</b></p>                                |
| <p>ST-Non144:<br/>           KSIPHHSNTPDYQEPNS<b>NYT</b>NDGKLVSFVVR<b>NT</b>STQESGKSA<b>AGEYYAAL</b>ASRSGDSA<b>AGEYYAALA</b><br/>           QESGKSA<b>AGEYYAAL</b>ASRSGDSA<b>AGEYYAALA</b>QESGKSA<b>AGEYYAAL</b>ASRSGDSA<b>AGEYYAALA</b>QESGSS<br/> <b>GGPG</b></p>                             |

The sequences are color-coded to indicate their origin: black, DPAPB (with glycosylation sites in bold); purple, the separator sequence GGPG of the H-segment; green, spectrin; light blue, disrupting GP repeat sequence; orange, GS repeat sequence; red, blue, and gray for chaperone-binding, non-binding, and linker sequences, respectively, as in Fig. 4A.
